# Supplementary material for: Self-assembly and regulation of protein cages from pre-organised coiled-coil modules
Source: PubMed Central journal article supplement (PMC7878516; doi:10.1038/s41467-021-21184-6), 2021-02-11
Supplement: 41467_2021_21184_MOESM2_ESM.pdf [file 41467_2021_21184_MOESM2_ESM.pdf]

## Description of Additional Supplementary Files

File Name: Supplementary Software 1

Description: The source code of the software used for evaluating CCPO cage's topology and for designing molecular models is provided here. The software is distributed under the MIT license.
